# Supplementary material for: Benefits of active site proximity in Cu@UiO-66 catalysts for efficient upgrading of ethanol to n-butanol
Source: Royal Society of Chemistry journal article supplement (doi:10.1039/d1se01002f), 2021-01-01
Supplement: d1se01002f1.pdf [file d1se01002f1.pdf]

## Supplementary Information

### **Benefits of active site proximity in Cu@UiO-66 catalysts for efficient upgrading of ethanol to n-butanol**

Jian Zhou<sup>a,‡</sup>, Yaohui He<sup>a,‡</sup>, Bing Xue<sup>a</sup>, Yunhui Cheng<sup>a</sup>, Danfeng Zhou<sup>a</sup>, Dong Wang<sup>a</sup>, Yajun He<sup>a</sup>, Weixin Guan<sup>a</sup>, Kegong Fang<sup>b</sup>, Lijun Zhang<sup>c</sup>, Jun Ni<sup>a,\*</sup>, and Xiaonian Li<sup>a</sup>

<sup>a</sup> Institute of Industrial Catalysis, Zhejiang University of Technology, Hangzhou 310014, P.R. China

<sup>b</sup> State Key Laboratory of Coal Conversion, Institute of Coal Chemistry, Chinese Academy of Sciences, Taiyuan 030001, P.R. China

<sup>c</sup> Key Laboratory of Chemical Utilization of Forestry Biomass in Zhejiang Province, College of Science, Zhejiang A & F University, Hangzhou 311300, P.R. China

\* Corresponding author and E-mail address: junni@zjut.edu.cn (Jun Ni)

‡ These authors contributed equally.

#### Table of Contents

|                                                                                                                              |    |
|------------------------------------------------------------------------------------------------------------------------------|----|
| Experimental Section.....                                                                                                    | 3  |
| <b>Table S1</b> The contents of Zr and Cu in Cu@UiO-66 catalysts.....                                                        | 4  |
| <b>Fig. S1</b> N <sub>2</sub> adsorption-desorption of the UiO-66 support and Cu@UiO-66 catalysts.....                       | 7  |
| <b>Fig. S2</b> XRD patterns of the UiO-66 support and reduced Cu@UiO-66 catalysts. ....                                      | 7  |
| <b>Fig. S3</b> TEM images of reduced 2% Cu@UiO-66 catalyst in the angle range from 45° to -45°. ....                         | 9  |
| <b>Fig. S4</b> TEM images of spent 2% Cu@UiO-66 catalyst in the angle range from 45° to -45°.....                            | 11 |
| <b>Fig. S5</b> EDS mapping of reduced 2% Cu@UiO-66 catalyst.....                                                             | 12 |
| <b>Fig. S6</b> <i>In situ</i> FTIR spectra of the reduced UiO-66 support and reduced Cu@UiO-66 catalysts.                    | 13 |
| <b>Fig. S7</b> H <sub>2</sub> -TPR profiles of Cu@UiO-66 catalysts.....                                                      | 13 |
| <b>Fig. S8</b> <i>In situ</i> FTIR of pyridine adsorption on the reduced UiO-66 support and reduced Cu@UiO-66 catalysts..... | 14 |
| <b>Fig. S9</b> NH <sub>3</sub> -TPD on the reduced UiO-66 support and reduced Cu@UiO-66 catalysts. ....                      | 14 |
| <b>Fig. S10</b> The correlation between external Cu content and Zr <sub>3</sub> -□ content. ....                             | 15 |

|                                                                                                                     |    |
|---------------------------------------------------------------------------------------------------------------------|----|
| <b>Table S2</b> The Zr <sub>3</sub> -□ content of Cu@UiO-66 catalysts.....                                          | 15 |
| <b>Fig. S11</b> The catalytic performance of 1%Cu@UiO-66 catalyst with time on-stream.....                          | 16 |
| <b>Table S3</b> The activity of catalysts in the reaction steps of the Guerbet route.....                           | 16 |
| <b>Table S4</b> Catalytic performance of Cu@UiO-66 catalysts at 280 °C. <sup>[a]</sup> .....                        | 17 |
| <b>Table S5</b> Catalytic performance of 2%Cu@UiO-66 catalyst at various residence times. <sup>[a]</sup> .....      | 17 |
| <b>Table S6</b> Catalytic performances reported for Cu-based catalysts. ....                                        | 18 |
| <b>Table S7</b> The activity of acetaldehyde condensation over Cu@UiO-66 catalysts. <sup>[a]</sup> .....            | 19 |
| <b>Fig. S12</b> (A) TEM image and corresponding histogram, and (B) EDS mapping of reduced 2%Cu/UiO-66 catalyst..... | 20 |
| References.....                                                                                                     | 21 |

## Experimental Section

### Materials

All chemicals were purchased from commercial sources and used without further purification. Specifically, zirconium chloride ( $\text{ZrCl}_4$ ), anhydrous *N,N*-dimethylformamide (DMF), acetic acid (HAc), and copper acetylacetonate ( $\text{Cu}(\text{acac})_2$ ) were purchased from Aladdin, acetylacetonate ( $\text{C}_5\text{H}_8\text{O}_2$ ) from Macklin, and 1,4-benzenedicarboxylic acid ( $\text{H}_2\text{BDC}$ ) from Acros.

### Synthesis of UiO-66 support

UiO-66 support was synthesized following the procedure reported in our previous work.<sup>1</sup> 5.25 g of  $\text{ZrCl}_4$  and 3.71 g of  $\text{H}_2\text{BDC}$  were added to 256 mL of DMF at room temperature. Then, 38.4 mL of HAc and 2 mL of water were added until all precursors were completely dissolved. The mixed solution was transferred to a hydrothermal vessel of 500 mL with Teflon liner and kept at 120 °C for 24 h under static conditions. After cooling to room temperature, the resulting UiO-66 solid was collected via centrifugation and thoroughly washed with a mixture of methanol and DMF (v/v=1:4) three times, and methanol two times. Finally, the UiO-66 was dried under vacuum at 150 °C for 12 h.

### Synthesis of Cu@UiO-66 catalysts

Cu@UiO-66 catalysts were prepared via an impregnation-reaction method (IRM) adopted in our group.<sup>1</sup> The acetylacetonate solution of  $\text{Cu}(\text{acac})_2$  was first prepared by dissolving 40.9, 81.8, 122.7, 204.5 mg of  $\text{Cu}(\text{acac})_2$  in 57.3 mL of acetylacetonate, respectively. Then, 1.0 g of UiO-66 was added to the above solution and reacted at 50 °C for 24 h before the acetylacetonate solvent was slowly evaporated at 120 °C. The remaining catalyst was further dried under vacuum overnight at 150 °C to obtain the Cu@UiO-66 catalysts with the Cu weight loading of 1.0 %, 2.0 %, 3.0 %, and 5.0 %, respectively.

### Synthesis of 2%Cu/UiO-66 catalyst

2%Cu/UiO-66 catalyst was prepared by an impregnation method: Briefly, 81.8 mg of  $\text{Cu}(\text{acac})_2$  was dissolved in 57.3 mL of acetylacetonate solution. 1.0 g of UiO-66 was then added to the above solution. After drying in the air to evaporate acetylacetonate, the catalyst was

obtained by further drying under vacuum at 150 °C for 12 h.

### Catalyst characterization

Textural properties of catalysts, namely BET surface area, pore volume, and pore diameter, were determined by N<sub>2</sub> adsorption-desorption using a Micromeritics 3FLEX apparatus with liquid nitrogen at the temperature of 77 K. The catalyst was outgassed at 150 °C for 4h before analysis. X-ray diffraction (XRD) data were collected on an X'Pert PRO X-ray diffractometer between 2 $\theta$  = 5° and 80° at 2°/min employing a Cu-K $\alpha$  radiation source ( $\lambda$  = 0.15406 nm). TEM imaging was performed on a Cu grid at an accelerating voltage of 200 kV using TALOS S-FEG TEM. The relative content of Cu was determined with the use of Wavelength-Dispersive XRF spectrometer (ThermoFisher Scientific, ADVANT'X 4200) and displayed in Table S1.

**Table S1** The contents of Zr and Cu in Cu@UiO-66 catalysts.

| Catalyst    | The content of Zr (wt.%) |                           | The content of Cu (wt.%) |                           |
|-------------|--------------------------|---------------------------|--------------------------|---------------------------|
|             | XRF <sup>[a]</sup>       | Calculated <sup>[b]</sup> | XRF <sup>[c]</sup>       | Calculated <sup>[d]</sup> |
| 1%Cu@UiO-66 | 92.66                    | 32.61                     | 3.37                     | 1.19                      |
| 2%Cu@UiO-66 | 89.66                    | 32.23                     | 6.51                     | 2.34                      |
| 3%Cu@UiO-66 | 86.88                    | 31.90                     | 9.11                     | 3.34                      |
| 5%Cu@UiO-66 | 83.37                    | 31.26                     | 14.08                    | 5.28                      |

[a] The content of Zr was measured by XRF.

[b] The content of Zr was calculated by taking the contents of C, H, and O into account.

[c] The content of Cu was measured by XRF.

[d] The content of Cu was calculated by taking the contents of C, H, and O into account.

Temperature-programed reduction (H<sub>2</sub>-TPR) and Temperature-programed desorption of NH<sub>3</sub> and CO<sub>2</sub> (NH<sub>3</sub>- and CO<sub>2</sub>-TPD) experiments were performed on a homemade TPD apparatus. For H<sub>2</sub>-TPR, 0.1g of catalyst was placed in a quartz reactor and heated from 50 °C to 270 °C at a rate of 5 °C/min in a 10% H<sub>2</sub>/Ar gas mixture (45 mL/min), and then maintained at 270 °C for 0.5 h. A thermal conductivity detector (TCD) was used to record the amount of H<sub>2</sub> consumption during the reduction of catalysts. For NH<sub>3</sub>- and CO<sub>2</sub>-TPD, 0.1g of catalyst was heated from 30 °C to 270 °C at a rate of 10 °C/min and reduced at 270 °C for 4 h in a 10% H<sub>2</sub>/Ar gas mixture (45 mL/min). After the reduction, the catalyst was cooled down to 50 °C in Ar flow of 45 mL/min. At the same temperature, the NH<sub>3</sub> saturation uptake of the reduced catalyst was achieved by passing 10% NH<sub>3</sub>/Ar (45 mL/min) for 0.5 h. After the NH<sub>3</sub> adsorption, the catalyst

was purged by Ar with a flow rate of 45 mL/min for 1 h. Finally, the temperature was linearly increased from 50 °C to 300 °C at a rate of 5 °C/min and remained at 300 °C for 1 h, while NH<sub>3</sub>-TPD profiles were recorded with a TCD.

The surface area of metallic Cu ( $S_{Cu}^0$ ) was determined by N<sub>2</sub>O titration in the same home-built TPD apparatus, following the procedure described by Van Der Grift et al.<sup>2,3</sup> Briefly, 0.1g of catalyst was reduced at 270 °C for 0.5 h in a 10% H<sub>2</sub>/Ar mixture at a flow rate of 45 mL/min. The corresponding hydrogen consumption detected by a thermal conductivity detector (TCD) was denoted as X. After cooling the catalyst to 100 °C in Ar, a flow of 20% N<sub>2</sub>O/N<sub>2</sub> (45 mL/min) was used to oxidize surface Cu atoms at 100 °C for 0.5 h. The reactor was then flushed with Ar to remove the oxidant. Finally, another TPR experiment with the same procedure was initiated. The hydrogen consumption in the second TPR was denoted as Y. The surface area of metallic Cu was calculated as:

$$S_{Cu}^0 = 2 \times Y \times N_{av} / (X \times M_{Cu} \times 1.4 \times 10^{19}) = 1353 \times Y/X \text{ (m}^2\text{/g}_{Cu}\text{)}$$

where  $N_{av}$  is Avogadro's constant,  $M_{Cu}$  is the relative atomic mass of copper (63.46 g/mol), and  $1.4 \times 10^{19}$  is the number of Cu atoms per square meter, because the average surface area of Cu atom is assigned as  $7.11 \times 10^{-2} \text{ nm}^2$ .

*In situ* FTIR (Fourier transform infrared spectroscopy) spectra were collected on a Nicolet IS50 FTIR spectrometer. 0.1g of catalyst was first mixed with 0.9g of KBr and ground into powder. 25 mg of the mixture was pressed into self-supporting wafers and mounted into an FTIR chamber. After being reduced by a 10% H<sub>2</sub>/Ar gas mixture (45 mL/min) at 270 °C for 4 h, the catalyst was cooled to 30 °C and purged by Ar at a flow rate of 30 mL/min. Then, a background spectrum was collected as a reference before the introduction of pyridine. After the chamber was flushed with Ar (30 mL/min) for 0.5 h to remove any gas-phase and physically adsorbed pyridine, FT-IR spectra of pyridine adsorption over reduced Cu@UiO-66 catalysts were recorded and subtracted from the background spectrum.

## Catalyst evaluation

All catalytic experiments were performed in a fixed-bed reactor. Typically, 0.5g of catalyst was placed in a tubular reactor (28 cm length, 8 mm internal diameter) and then reduced by a 10% H<sub>2</sub>/N<sub>2</sub> gas mixture at 270 °C for 4 h. The reaction was carried out under the following conditions: 270 °C, 2 MPa, LHSV=4 mL/(h·g·cat), and N<sub>2</sub>/ethanol(v/v)=500:1. Before admission of ethanol into the reaction system, ethanol was vaporized in a preheating section kept at 160 °C. The total pressure of 2 MPa was achieved by regulating a back pressure valve after the reactor. The liquid products were condensed and analyzed by a Gas chromatograph (GC) with a flame ionization detector (FID) and an EN-20 column (30 m, 0.25 mm inner diameter, 0.25 μm film thickness).

The ethanol conversion, selectivity, and yield of products were calculated as follows:

$$\text{Ethanol conversion (\%)} = \frac{C \text{ mol of products}}{C \text{ mol of (products + unreacted ethanol)}} \times 100\%$$

$$\text{Product selectivity (\%)} = \frac{C \text{ mol of specific product}}{C \text{ mol of products}} \times 100\%$$

$$\text{Product yield (\%)} = \text{Ethanol conversion} \times \text{Product selectivity}$$

where C mol is the mole number of carbon in the products and unreacted ethanol.

The acetaldehyde condensation was carried out in a high-pressure reactor (50 mL). 0.05 g of catalysts and 20 mL of 10% acetaldehyde/toluene solution were then added. After the reaction time of 4 h at 250 °C in N<sub>2</sub> with stirring speed at 800 rpm, the reactor was cooled down to room temperature and the samples were taken for analysis.

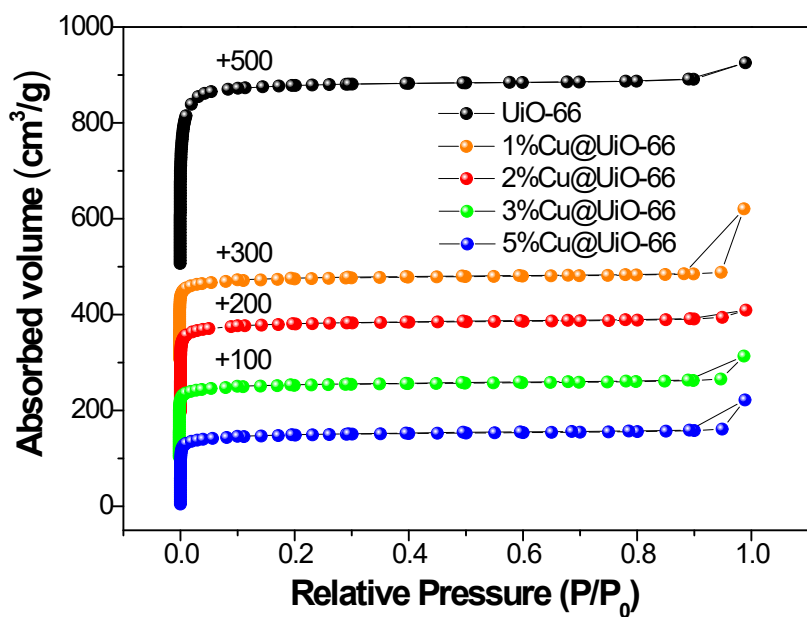

Fig. S1 N<sub>2</sub> adsorption-desorption of the UiO-66 support and Cu@UiO-66 catalysts.

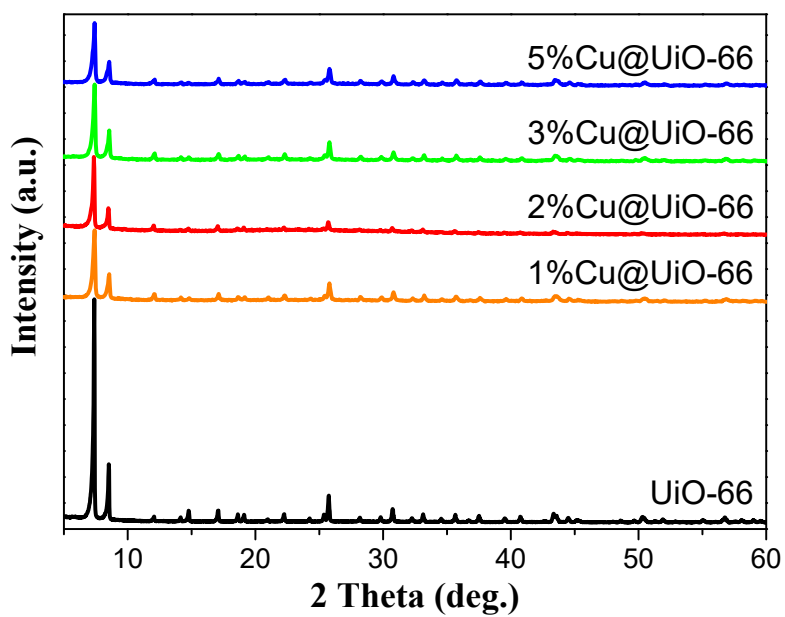

Fig. S2 XRD patterns of the UiO-66 support and reduced Cu@UiO-66 catalysts.

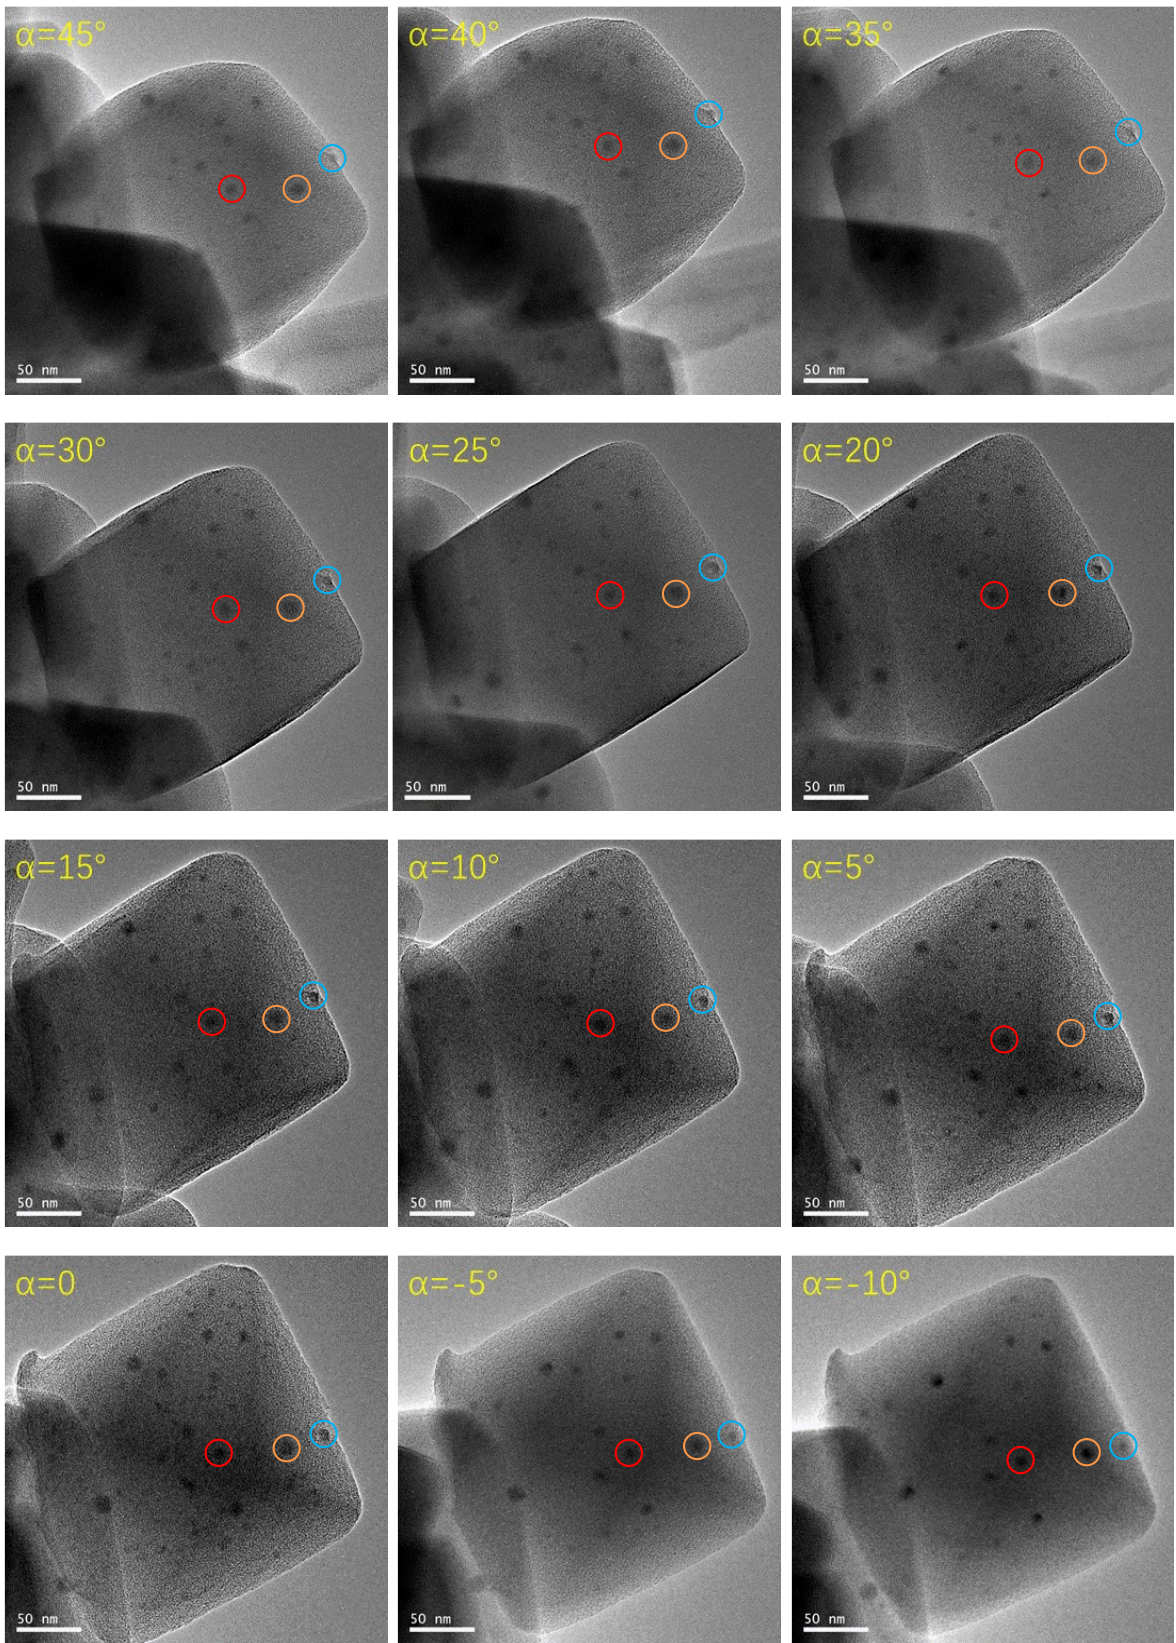



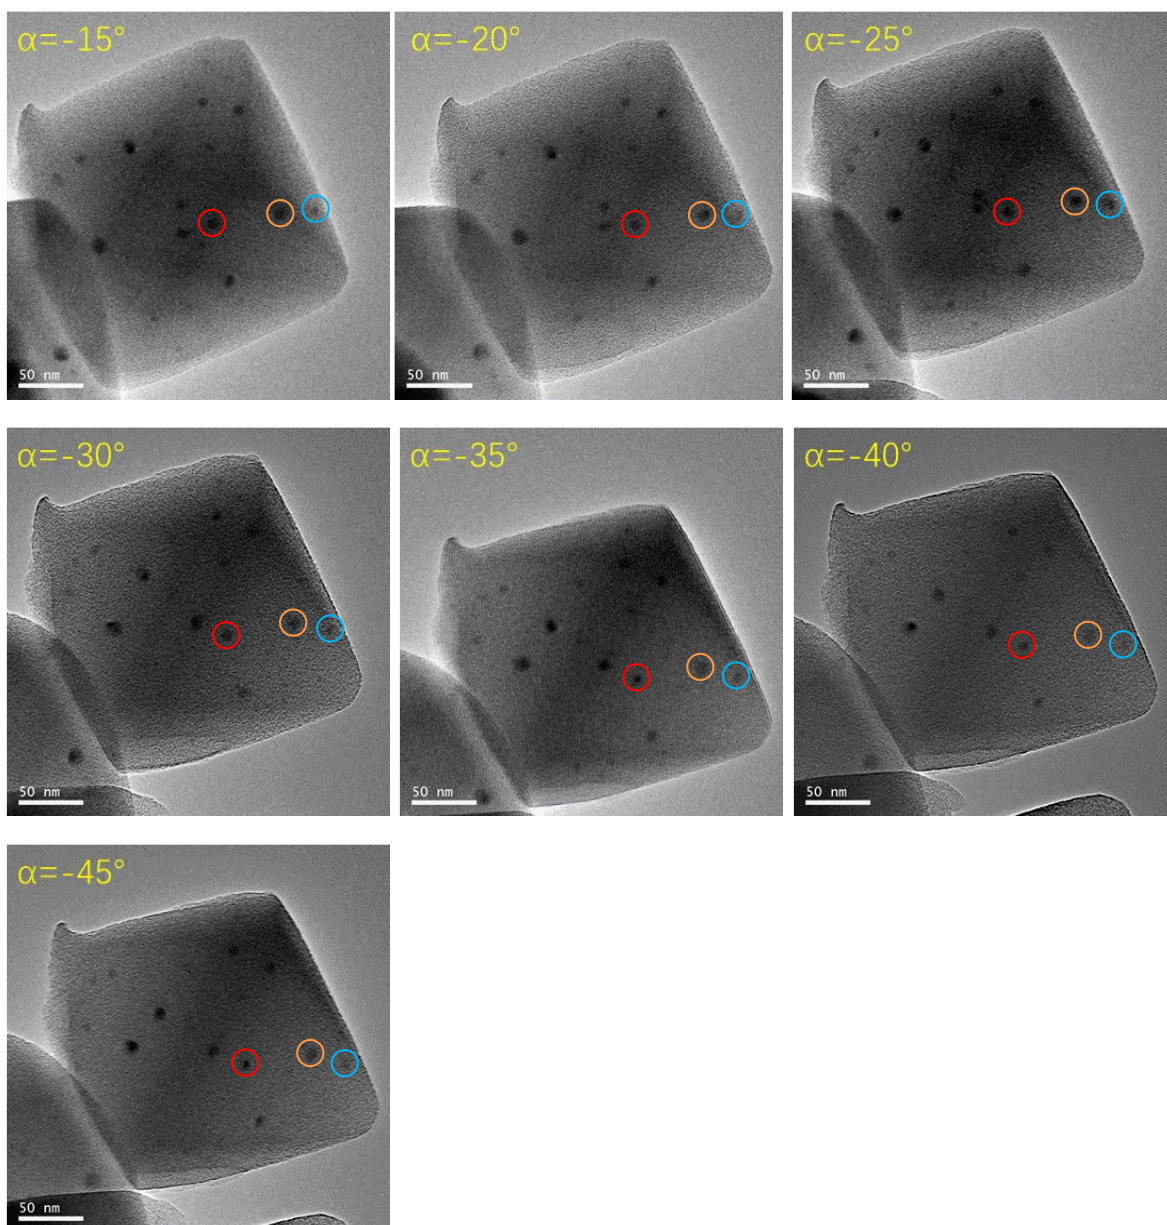

**Fig. S3** TEM images of reduced 2% Cu@UiO-66 catalyst in the angle range from 45° to -45°.

Three representative Cu particles are circled. The one located on the external surface of UiO-66 is in a blue circle, the other two in the pores of UiO-66 are in red and orange circles. With the rotation of the catalyst from 45° to -45°, the one on the external surface of UiO-66 gradually moves away from the edge of the UiO-66 framework and its signal intensity also varies. In contrast, there is no significant movement and signal intensity change of the Cu particles in the pores of UiO-66.

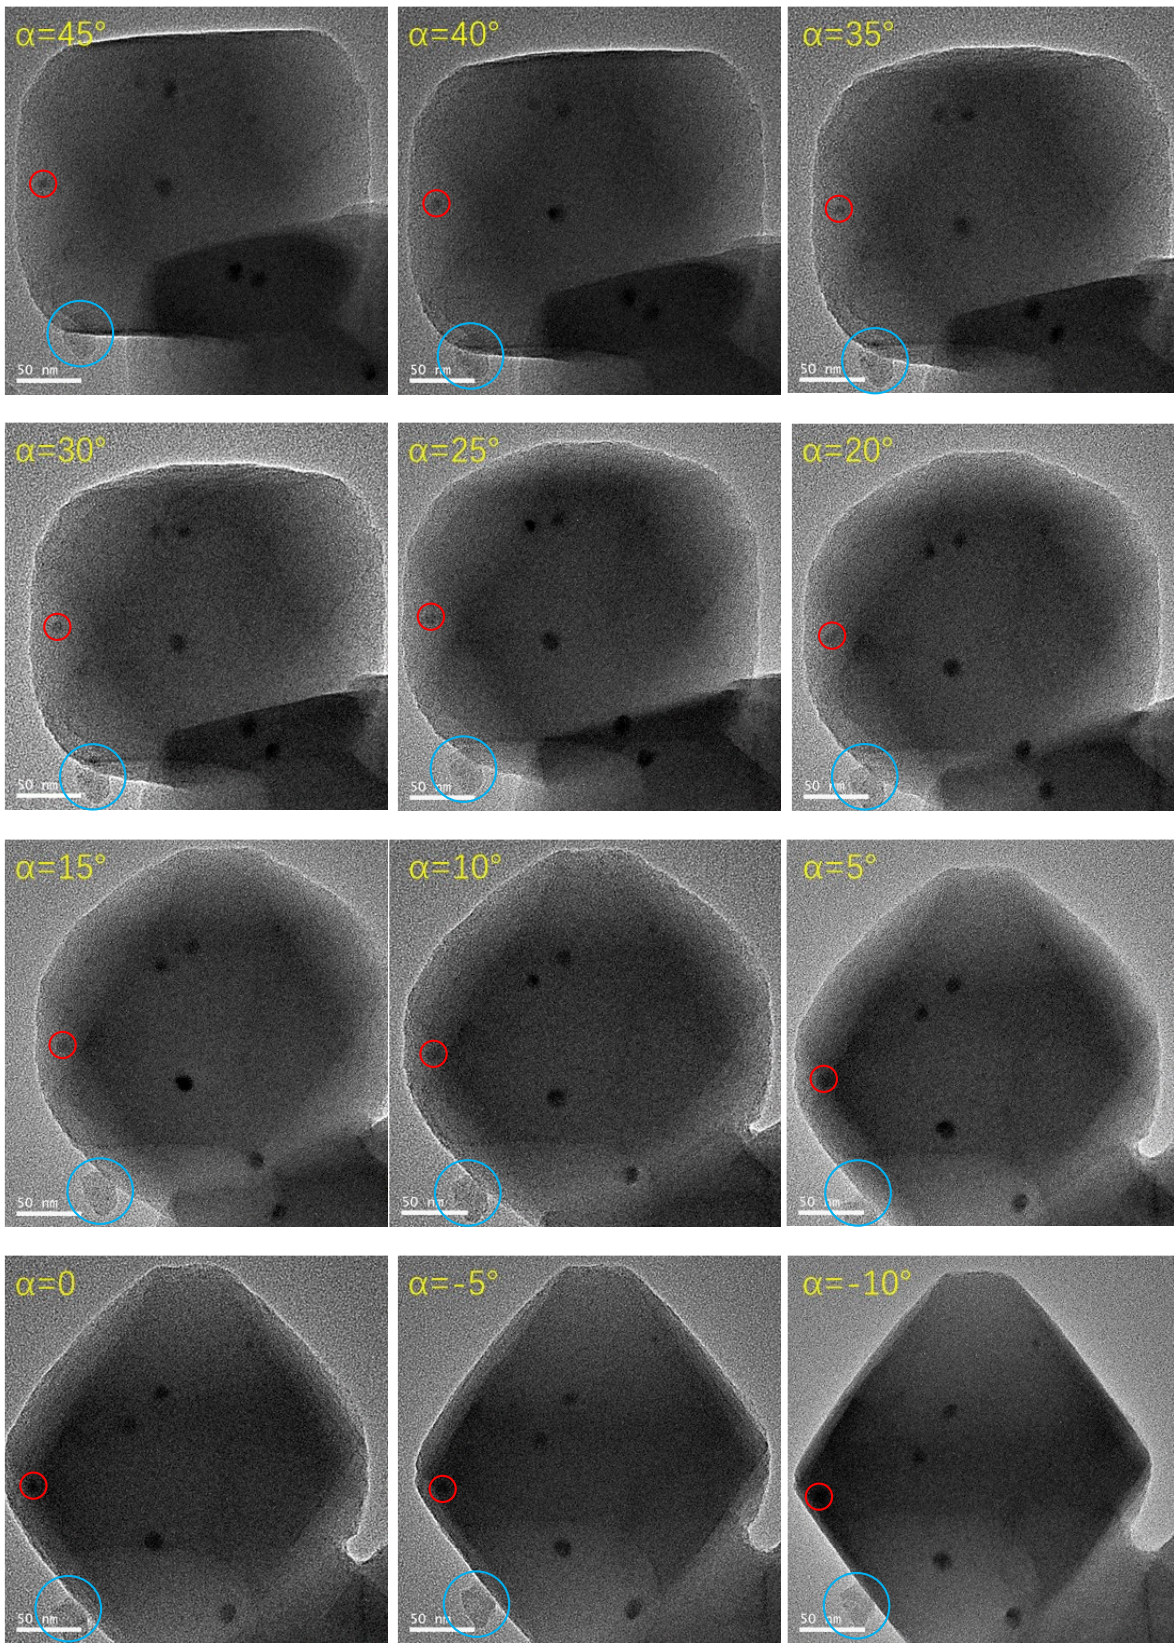

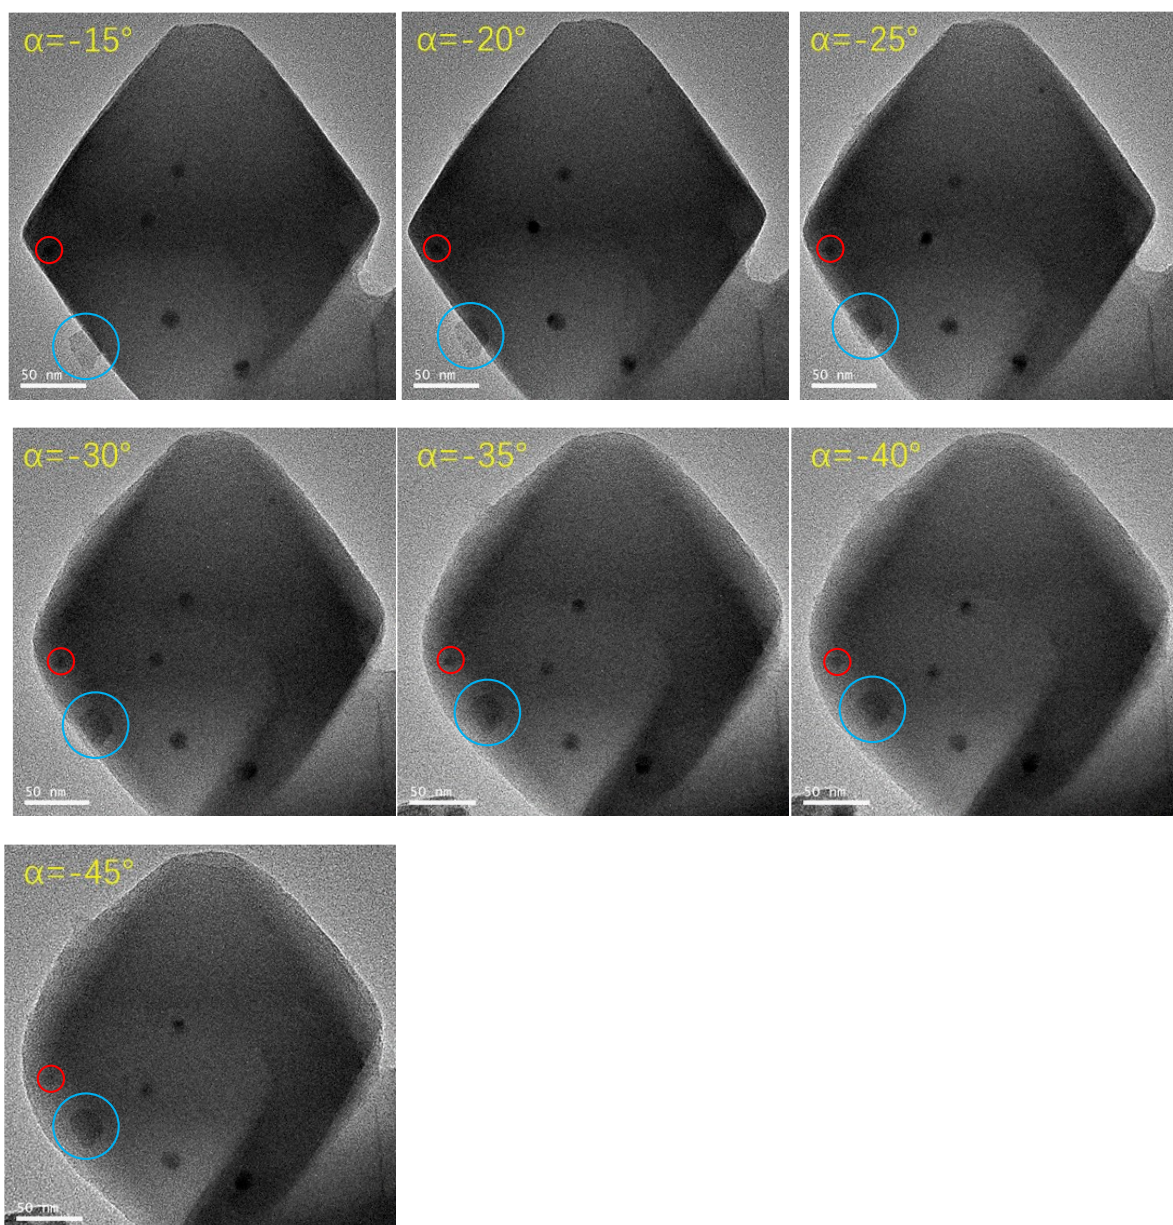

**Fig. S4** TEM images of spent 2% Cu@UiO-66 catalyst in the angle range from 45° to -45°.

A representative Cu particle is circled in red and the amorphous carbon produced during the reaction is circled in blue. With the rotation of the catalyst from 45° to -45°, the amorphous carbon turns from the front to the back of UiO-66. In contrast, the Cu particle remains in the framework of UiO-66 regardless of the rotation angle. This is strong evidence that this Cu particle is in the pores of UiO-66.

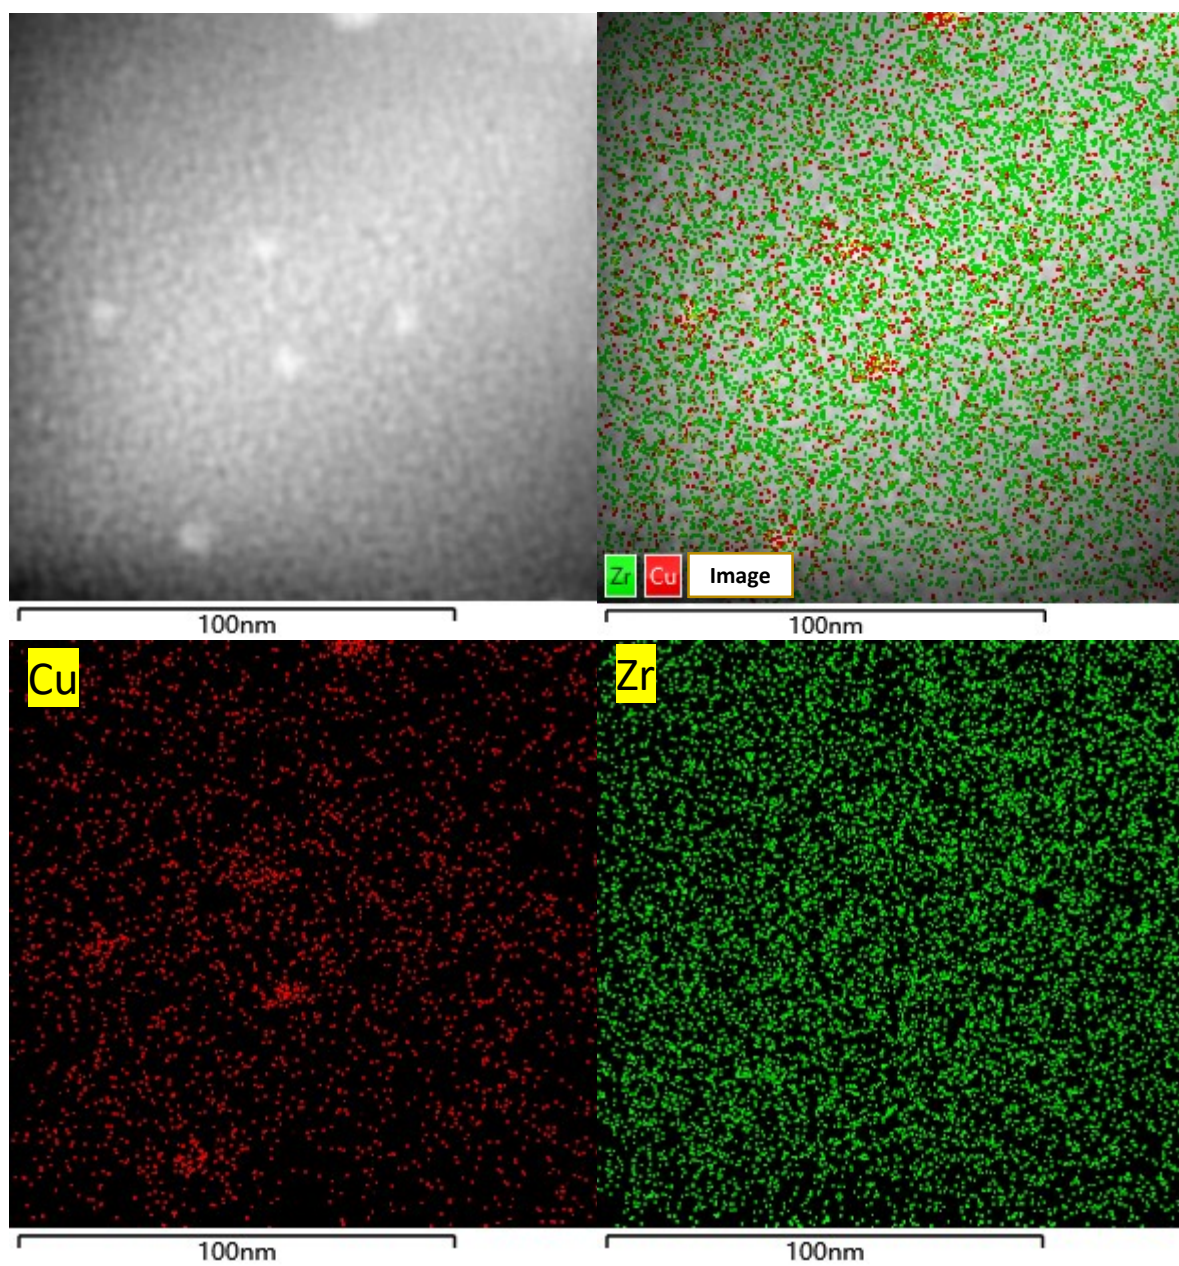

**Fig. S5** EDS mapping of reduced 2% Cu@UiO-66 catalyst.

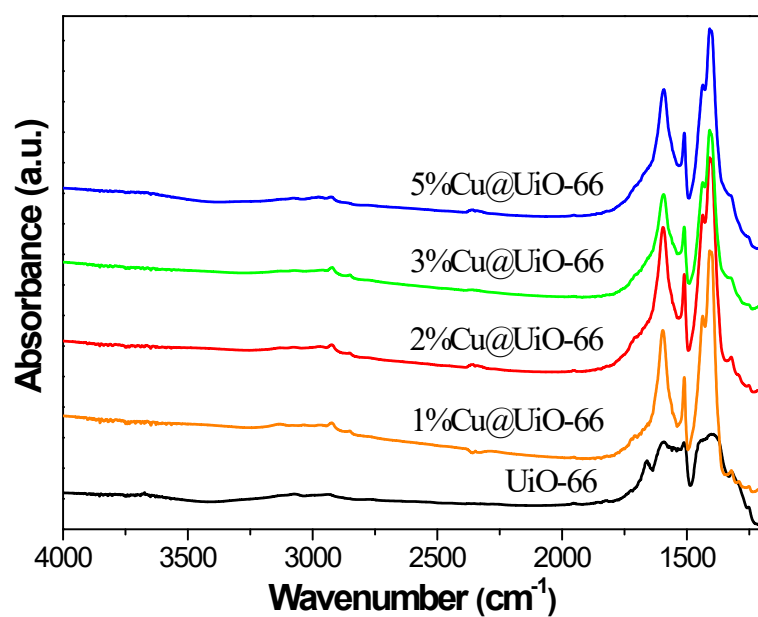

**Fig. S6** *In situ* FTIR spectra of the reduced UiO-66 support and reduced Cu@UiO-66 catalysts.

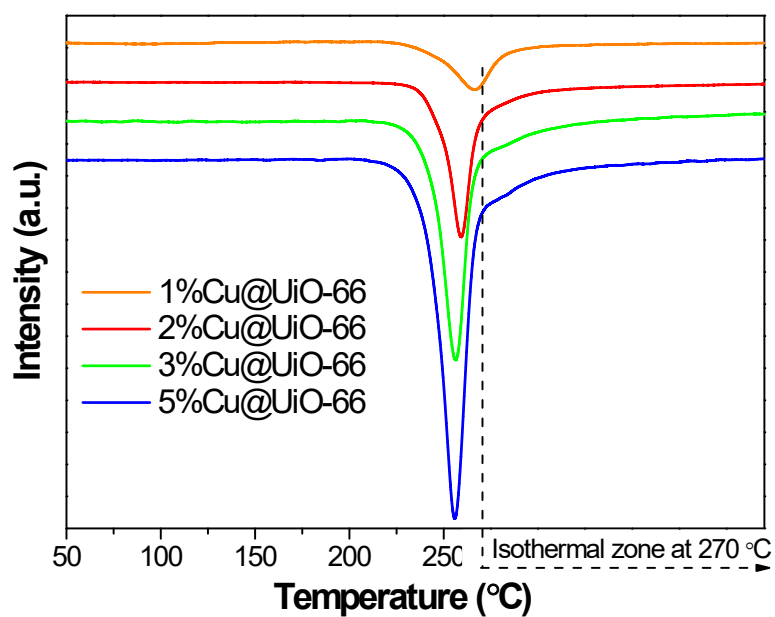

**Fig. S7** H<sub>2</sub>-TPR profiles of Cu@UiO-66 catalysts.

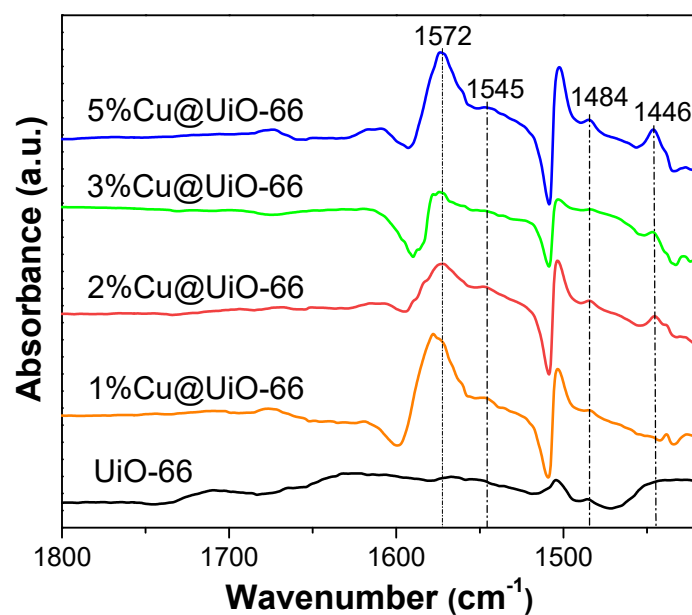

**Fig. S8** *In situ* FTIR of pyridine adsorption on the reduced UiO-66 support and reduced Cu@UiO-66 catalysts.

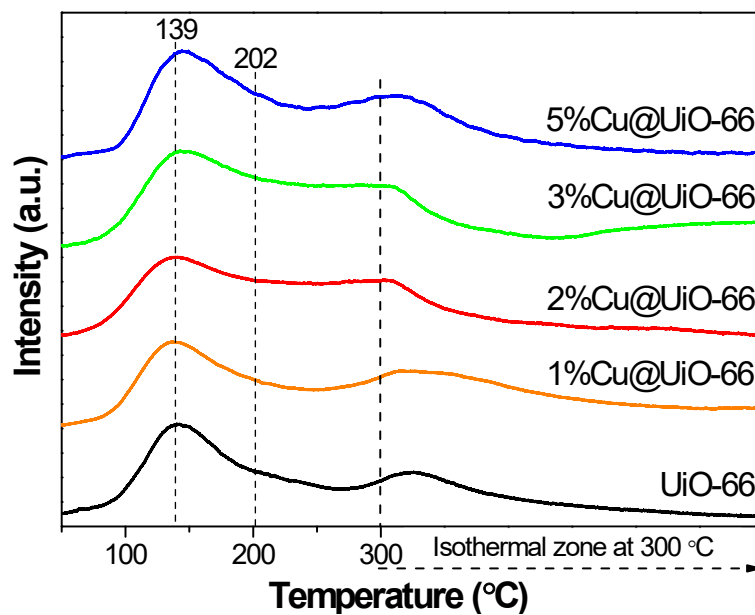

**Fig. S9** NH<sub>3</sub>-TPD on the reduced UiO-66 support and reduced Cu@UiO-66 catalysts.

The peak in the isothermal zone at 300 °C is related to the loss of acetate due to the introduction of acetic acid as modulator molecules in the synthesis of UiO-66 and thus was not taken into account.<sup>4</sup>

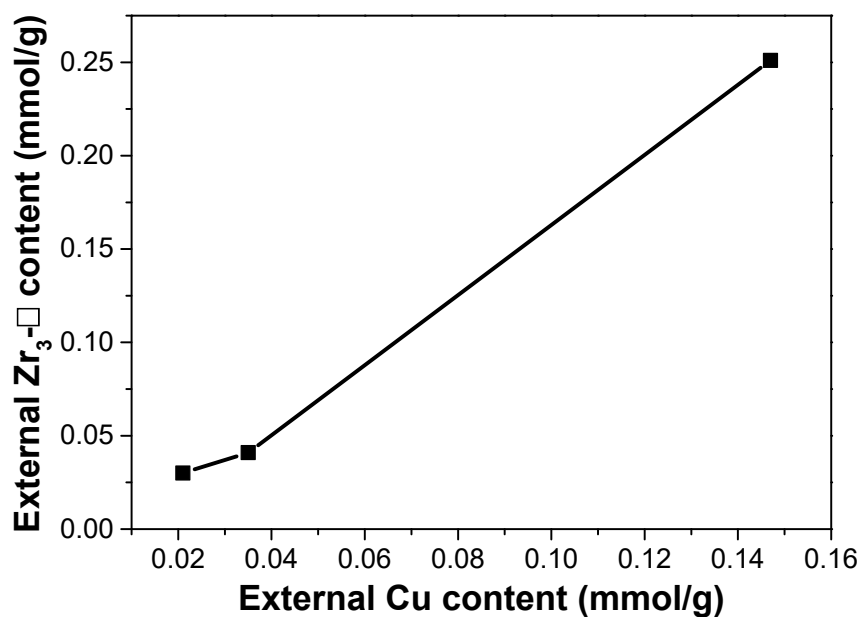

**Fig. S10** The correlation between external Cu content and Zr<sub>3</sub>-O content.

**Table S2** The Zr<sub>3</sub>-O content of Cu@UiO-66 catalysts.

| Catalyst    | Zr <sub>3</sub> -O content (mmol/g) |                                    |                         |                      |
|-------------|-------------------------------------|------------------------------------|-------------------------|----------------------|
|             | Internal <sup>[a]</sup>             | Via dehydroxylation <sup>[b]</sup> | External <sup>[c]</sup> | Total <sup>[d]</sup> |
| 1%Cu@UiO-66 | 0.046                               | 0.370                              | 0.030                   | 0.446                |
| 2%Cu@UiO-66 | 0.090                               | 0.326                              | 0.041                   | 0.457                |
| 3%Cu@UiO-66 | 0.091                               | 0.325                              | 0.251                   | 0.667                |
| 5%Cu@UiO-66 | 0.092                               | 0.324                              | 0.263                   | 0.679                |

[a] Generated in Scheme 2b and calculated according to the hydrogen consumption of the reduction of Cu on the internal surface of UiO-66.

[b] Generated in Scheme 2c and calculated according to the difference between the total content of Zr<sub>3</sub>-O and the contents of Zr<sub>3</sub>-O generated both in Scheme 2b and Scheme 2d.

[c] Generated in Scheme 2d and calculated according to the difference between the total content of Zr<sub>3</sub>-O and that generated on UiO-66 in Scheme 2c as listed in Table 3.

[d] Calculated to be the same amount as that of 6-fold coordinated Zr sites determined by NH<sub>3</sub>-TPD in Table 3.

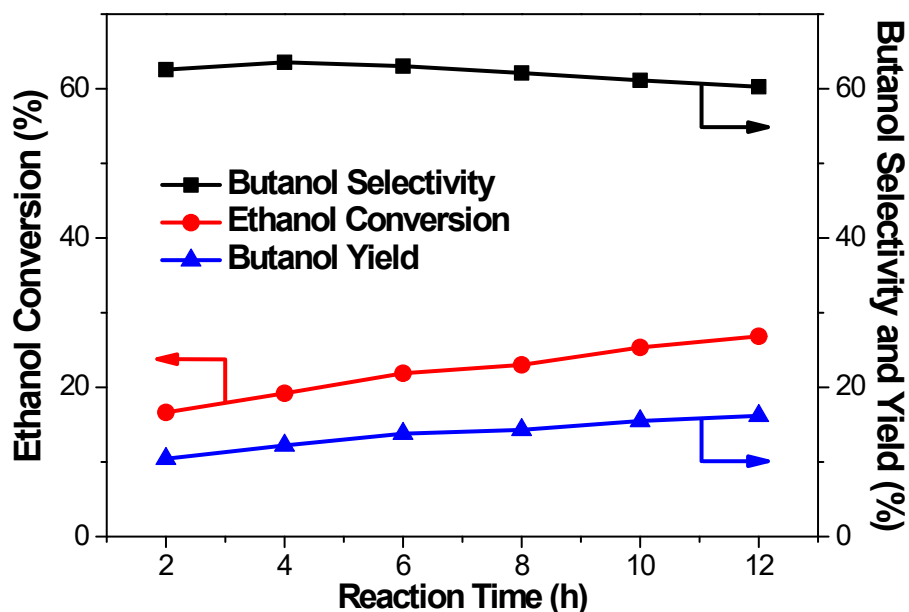

**Fig. S11** The catalytic performance of 1%Cu@UiO-66 catalyst with time on-stream.

**Table S3** The activity of catalysts in the reaction steps of the Guerbet route.

| Catalyst                   | The activity of catalysts (%)  |                            |                             |                              |                             |
|----------------------------|--------------------------------|----------------------------|-----------------------------|------------------------------|-----------------------------|
|                            | Dehydrogenation <sup>[a]</sup> | Dehydration <sup>[b]</sup> | Condensation <sup>[c]</sup> | Hydrogenation <sup>[d]</sup> | Liquid yield <sup>[e]</sup> |
| 1%Cu@UiO-66                | 23.5                           | 0.29                       | 19.0                        | 19.0                         | 98.3                        |
| 2%Cu@UiO-66                | 26.5                           | 0.34                       | 21.9                        | 21.9                         | 98.2                        |
| 3%Cu@UiO-66                | 28.2                           | 0.36                       | 22.7                        | 22.7                         | 97.4                        |
| 5%Cu@UiO-66                | 28.0                           | 0.29                       | 22.8                        | 22.8                         | 98.4                        |
| 2%Cu@UiO-66 <sup>[f]</sup> | 42.7                           | 0.24                       | 34.5                        | 34.5                         | 92.5                        |
| 2%Cu/UiO-66 <sup>[g]</sup> | 19.5                           | 0.08                       | 15.7                        | 15.7                         | 98.7                        |

[a] Dehydrogenation ability includes the yields of ethanol derivatives except for diethyl ether.

[b] Dehydration ability includes the yield of diethyl ether.

[c] Condensation ability includes the yields of butyraldehyde, butanol, C<sub>6</sub> products, and others. All of them are derived from acetaldehyde condensation.

[d] Hydrogenation ability includes the yields of butyraldehyde, butanol, C<sub>6</sub> products, and others.

[e] The mass ratio of liquid products in the output to reactants in the input.

[f] The reaction temperature was 280 °C.

[g] The catalyst was synthesized by an impregnation method using acetylacetone as the solvent.



**Table S4** Catalytic performance of Cu@UiO-66 catalysts at 280 °C.<sup>[a]</sup>

| Catalyst    | Conv. (%) | Selectivity <sup>[b]</sup> (%) |       |      |     |      |                         |        | BuOH Yield (%) |
|-------------|-----------|--------------------------------|-------|------|-----|------|-------------------------|--------|----------------|
|             |           | AcH                            | Ether | EA   | BuH | BuOH | C <sub>6</sub> products | Others |                |
| 1%Cu@UiO-66 | 38.9      | 7.9                            | 0.7   | 8.1  | 5.6 | 52.8 | 15.9                    | 6.1    | 20.5           |
| 2%Cu@UiO-66 | 42.9      | 7.7                            | 0.5   | 11.5 | 5.7 | 50.3 | 17.9                    | 6.4    | 21.6           |
| 3%Cu@UiO-66 | 46.6      | 6.9                            | 0.8   | 12.5 | 6.3 | 46.5 | 20.5                    | 6.5    | 21.7           |
| 5%Cu@UiO-66 | 50.7      | 5.3                            | 0.5   | 17.7 | 5.1 | 43.9 | 24.2                    | 3.3    | 22.2           |

[a] Conversion, selectivity and yield were obtained at steady-state; reaction conditions: 0.5 g catalyst, 280 °C, 2 MPa, LHSV=2 h<sup>-1</sup>, N<sub>2</sub>/ethanol(v/v) = 500:1.

[b] AcH = acetaldehyde; Ether = diethyl ether; EA= ethyl acetate; BuH = butyraldehyde; BuOH = butanol; C<sub>6</sub> products mainly include 2-ethylbutyraldehyde, hexaldehyde, 2-ethylbutanol, and 1-hexanol; Other products include 2-pentanone, 1,1-diethoxyethane, butyl acetate, etc.

**Table S5** Catalytic performance of 2%Cu@UiO-66 catalyst at various residence times.<sup>[a]</sup>

| LHSV (h <sup>-1</sup> ) | Conv. (%) | Selectivity <sup>[b]</sup> (%) |       |     |     |      |                         |        | BuOH Yield (%) |
|-------------------------|-----------|--------------------------------|-------|-----|-----|------|-------------------------|--------|----------------|
|                         |           | AcH                            | Ether | EA  | BuH | BuOH | C <sub>6</sub> products | Others |                |
| 1                       | 27.3      | 8.1                            | 0.8   | 9.7 | 4.1 | 60.5 | 9.2                     | 7.4    | 16.5           |
| 2                       | 26.8      | 9.0                            | 1.2   | 8.3 | 4.3 | 60.3 | 8.2                     | 8.7    | 16.2           |
| 4                       | 22.6      | 11.5                           | 1.3   | 8.2 | 5.5 | 56.5 | 7.6                     | 9.4    | 12.8           |

[a] Conversion, selectivity, and yield were obtained at steady-state; reaction conditions: 0.5 g catalyst, 250 °C, 2 MPa.

[b] AcH = acetaldehyde; Ether = diethyl ether; EA= ethyl acetate; BuH = butyraldehyde; BuOH = butanol; C<sub>6</sub> products mainly include 2-ethylbutyraldehyde, hexaldehyde, 2-ethylbutanol, and 1-hexanol; Other products include 2-pentanone, 1,1-diethoxyethane, butyl acetate, etc.

**Table S6** Catalytic performances reported for Cu-based catalysts.

| Catalyst                                            | Reactor          | Reaction Conditions                                            | Conversion (%) | BuOH Selectivity (%) | BuOH Yield (%) | Ref.             |
|-----------------------------------------------------|------------------|----------------------------------------------------------------|----------------|----------------------|----------------|------------------|
| <b>Cu@UiO-66</b>                                    | <b>Fixed-bed</b> | <b>280 °C, 2 MPa, LHSV=4 mL/(h·g·cat)</b>                      | <b>50.7</b>    | <b>43.9</b>          | <b>22.2</b>    | <b>This work</b> |
| Cu/Al <sub>2</sub> O <sub>3</sub>                   | Fixed-bed        | 260 °C, 10 MPa, LHSV=1.97 h <sup>-1</sup> , sc CO <sub>2</sub> | 48             | 7                    | 3              | 5                |
| Cu/ZSM-5                                            | Fixed-bed        | 260 °C, 10 MPa, LHSV=1.97 h <sup>-1</sup> , sc CO <sub>2</sub> | 15             | 2                    | 0              | 5                |
| Cu/CeO <sub>2</sub>                                 | Fixed-bed        | 260 °C, 10 MPa, LHSV=1.97 h <sup>-1</sup> , sc CO <sub>2</sub> | 39             | 35                   | 13             | 5                |
| Cu/HSA-CeO <sub>2</sub>                             | Fixed-bed        | 260 °C, 10 MPa, LHSV=1.97 h <sup>-1</sup> , sc CO <sub>2</sub> | 67             | 45                   | 30             | 5                |
| Cu/TiO <sub>2</sub>                                 | Fixed-bed        | 260 °C, 10 MPa, LHSV=1.97 h <sup>-1</sup> , sc CO <sub>2</sub> | 53             | 25                   | 13             | 5                |
| Cu/SiO <sub>2</sub> -Al <sub>2</sub> O <sub>3</sub> | Fixed-bed        | 260 °C, 10 MPa, LHSV=1.97 h <sup>-1</sup> , sc CO <sub>2</sub> | 30             | 14                   | 6              | 5                |
| Cu-CeO <sub>2</sub> /AC                             | Fixed-bed        | 250 °C, 2MPa, LHSV=4 mL/(h·g·cat), 48h                         | 46.2           | 41.3                 | 19.1           | 6                |
| G <sub>x</sub> -CuCeO <sub>2</sub> /AC              | Fixed-bed        | 250 °C, 2 MPa, LHSV=2h <sup>-1</sup>                           | 42.3           | 48.9                 | 20.7           | 7                |
| Cu/HSAG                                             | Fixed-bed        | 230 °C, 5MPa, LHSV=2.4 mL/(h·g·cat)                            | 17             | 4                    | 0.7            | 8                |
| 2.5Cu2.5Ni/HSAG                                     | Fixed-bed        | 230 °C, 5MPa, LHSV=2.4 mL/(h·g·cat)                            | 20             | 4                    | 0.8            | 8                |
| 5Cu-Mn/HSAG                                         | Fixed-bed        | 230 °C, 5MPa, LHSV=2.4 mL/(h·g·cat)                            | 27             | 33                   | 8.9            | 8                |
| 2.5Cu2.5Ni-Mn/HSAG                                  | Fixed-bed        | 230 °C, 5MPa, LHSV=2.4 mL/(h·g·cat)                            | 37             | 36                   | 13.3           | 8                |
| 5Cu/G                                               | Fixed-bed        | 230 °C, 5MPa, LHSV=2.4 mL/(h·g·cat), 24h                       | 17             | 4                    | 0.7            | 9                |
| 5Cu-Mg/G                                            | Fixed-bed        | 230 °C, 5MPa, LHSV=2.4 mL/(h·g·cat), 24h                       | 26             | 26                   | 6.8            | 9                |
| 5Cu-Ba/G                                            | Fixed-bed        | 230 °C, 5MPa, LHSV=2.4 mL/(h·g·cat), 24h                       | 28             | 13                   | 3.6            | 9                |
| 5Cu-Zn/G                                            | Fixed-bed        | 230 °C, 5MPa, LHSV=2.4 mL/(h·g·cat), 24h                       | 25             | 11                   | 2.8            | 9                |
| 5Cu-Mn/G                                            | Fixed-bed        | 230 °C, 5MPa, LHSV=2.4 mL/(h·g·cat), 24h                       | 27             | 33                   | 8.9            | 9                |
| Cu/HT                                               | Parr autoclave   | 215 °C, 4MPa                                                   | 24.7           | 53                   | 13.1           | 10               |
| 0.5%Cu/Al <sub>2</sub> O <sub>3</sub>               | Parr autoclave   | 275 °C, 3h                                                     | 25.0           | 78.8                 | 19.7           | 11               |
| 1%Cu/Al <sub>2</sub> O <sub>3</sub>                 | Parr autoclave   | 275 °C, 3h                                                     | 27.2           | 78.5                 | 21.4           | 11               |
| 2%Cu/Al <sub>2</sub> O <sub>3</sub>                 | Parr autoclave   | 275 °C, 3h                                                     | 31.5           | 81.9                 | 25.8           | 11               |
| 5%Cu/Al <sub>2</sub> O <sub>3</sub>                 | Parr autoclave   | 275 °C, 3h                                                     | 33.5           | 80.2                 | 26.9           | 11               |

|                                      |                |            |      |      |      |    |
|--------------------------------------|----------------|------------|------|------|------|----|
| 10%Cu/Al <sub>2</sub> O <sub>3</sub> | Parr autoclave | 275 °C, 3h | 27.2 | 71.9 | 19.6 | 11 |
|--------------------------------------|----------------|------------|------|------|------|----|

---

**Table S7** The activity of acetaldehyde condensation over Cu@UiO-66 catalysts.<sup>[a]</sup>

| Catalyst      | Conversion (%) | Crotonaldehyde Selectivity (%) | Crotonaldehyde Yield (%) |
|---------------|----------------|--------------------------------|--------------------------|
| UiO-66        | 40.4           | 100                            | 40.4                     |
| 1wt%Cu@UiO-66 | 52.6           | 100                            | 52.6                     |
| 2wt%Cu@UiO-66 | 56.0           | 100                            | 56.0                     |
| 3wt%Cu@UiO-66 | 57.9           | 100                            | 57.9                     |
| 5wt%Cu@UiO-66 | 59.9           | 100                            | 59.9                     |

[a] Conversion, selectivity and yield were obtained at steady-state; reaction conditions: 0.05 g catalyst, 250 °C , 20 mL of 10% acetaldehyde/toluene solution.

Please noted that external  $Zr_{T3}$  may participate in the condensation when using acetaldehyde as the reactant, thus the conversion of acetaldehyde increases as the increase in Cu loading.

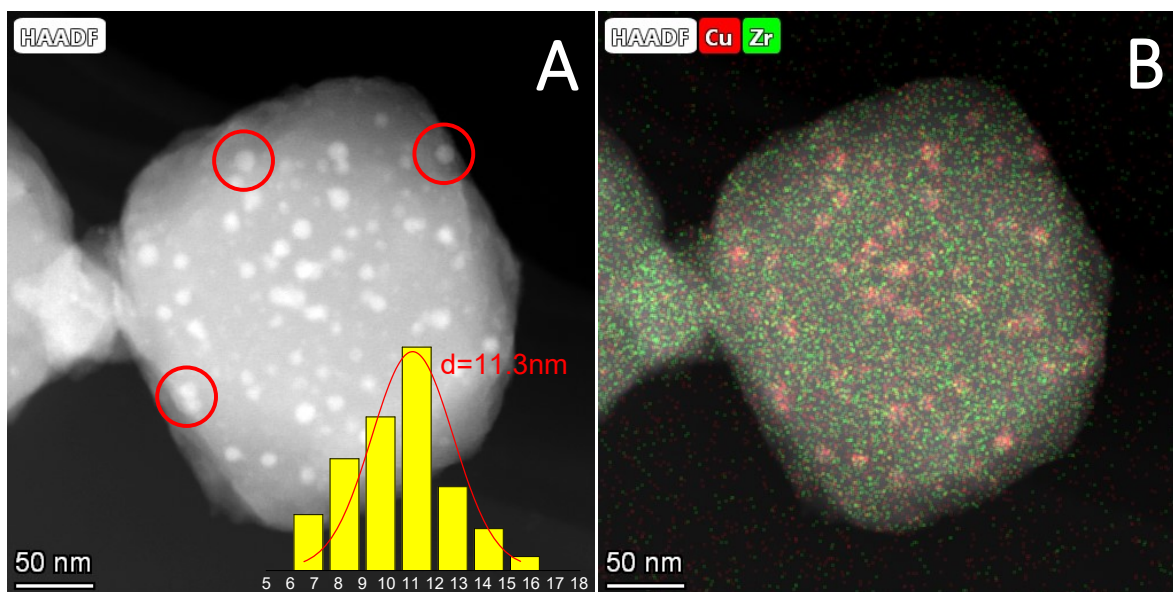

**Fig. S12** (A) TEM image and corresponding histogram, and (B) EDS mapping of reduced 2%Cu/UiO-66 catalyst.

Comparing with the 2%Cu@UiO-66 catalyst, the 2%Cu/UiO-66 catalyst has more Cu particles located at the edge of UiO-66 support and has an average Cu particle size of 11.26 nm. Moreover, the surface area of metallic Cu per gram of Cu ( $S_{Cu}^0$ ) is only 112.4 m<sup>2</sup>/g<sub>Cu</sub>, much less than that of 2%Cu@UiO-66 (301.5 m<sup>2</sup>/g<sub>Cu</sub>), meaning a severe Cu aggregation. This larger particle size of Cu on the 2%Cu/UiO-66 catalyst indicates that the interaction between Cu metals and Zr<sub>3</sub>-□ is weaker than that on the 2%Cu@UiO-66 catalyst. Although some Cu metals are interacting with Zr<sub>3</sub>-□, their number is significantly reduced, thus the activity in terms of dehydrogenation, dehydration, condensation, and hydrogenation reduces.

## References

1. D. Jiang, G. Fang, Y. Tong, X. Wu, Y. Wang, D. Hong, W. Leng, Z. Liang, P. Tu, L. Liu, K. Xu, J. Ni and X. Li, *ACS Catal.*, 2018, 8, 11973-11978.
2. C. J. G. Van Der Grift, A. F. H. Wielers, B. P. J. Jogh, J. Van Beunum, M. De Boer, M. Versluijs-Helder and J. W. Geus, *J. Catal.*, 1991, 131, 178-189.
3. S. Xia, R. Nie, X. Lu, L. Wang, P. Chen and Z. Hou, *J. Catal.*, 2012, 296, 1-11.
4. G. C. Shearer, S. Chavan, S. Bordiga, S. Svelle, U. Olsbye and K. P. Lillerud, *Chem. Mater.*, 2016, 28, 3749-3761.
5. J. H. Earley, R. A. Bourne, M. J. Watson and M. Poliakoff, *Green Chem.*, 2015, 17, 3018-3025.
6. D. Jiang, X. Wu, J. Mao, J. Ni and X. Li, *Chem. Commun.*, 2016, 52, 13749-13752.
7. Y. Tong, J. Zhou, Y. He, P. Tu, B. Xue, Y. Cheng, J. Cen, Y. Zheng, J. Ni and X. Li, *ChemistrySelect*, 2020, 5, 7714-7719.
8. C. Lopez-Olmos, A. Guerrero-Ruiz and I. Rodríguez-Ramos, *Catal. Today*, 2020, 357, 132-142.
9. C. Lopez-Olmos, M. V. Morales, A. Guerrero-Ruiz and I. Rodríguez-Ramos, *Ind. Eng. Chem. Res.*, 2020, 59, 16626-16636.
10. P. Benito, A. Vaccari, C. Antonetti, D. Licursi, N. Schiarioli, E. Rodriguez-Castellón and A. M. Raspolti Galletti, *J. Clean. Prod.*, 2019, 209, 1614-1623.
11. A. V. Chistyakov, S. A. Nikolaev, P. A. Zharova, M. V. Tsodikov and F. Manenti, *Energy*, 2019, 166, 569-576.
